# Supplementary material for: Imaging of genetically engineered T cells by PET using gold nanoparticles complexed to Copper-64
Source: Royal Society of Chemistry journal article supplement (doi:10.1039/c2ib20093g), 2012-09-18
Supplement: c2ib20093g.pdf [file c2ib20093g.pdf]

# Imaging of Genetically Engineered T Cells by PET using Gold Nanoparticle Complexed to Copper-64

Parijat Bhatnagar<sup>a</sup>, Zheng Li<sup>b</sup>, Yoonsu Choi<sup>c</sup>, Jianfeng Guo<sup>b</sup>, Feng Li<sup>b</sup>, Daniel Y Lee<sup>b</sup>, Matthew Figliola<sup>c</sup>, Helen Huls<sup>c</sup>, Dean A. Lee<sup>c,d</sup>, Tomasz Zal<sup>e</sup>, King C Li<sup>b</sup>, and Laurence JN Cooper<sup>\*c,d</sup>

DOI: 10.1039/b000000x

<sup>a</sup>Baylor College of Medicine & Texas Children's Hospital, Department of Obstetrics & Gynecology, Division of Maternal Fetal Medicine, Houston, TX 77030

<sup>b</sup>Department of Radiology, The Methodist Hospital Research Institute, Houston, TX 77030

<sup>c</sup>Division of Pediatrics, The University of Texas MD Anderson Cancer Center, Houston, TX 77030 Phone: (713) 563-3208; Fax: (713) 792-9832; E-mail: ljncoper@mdanderson.org

<sup>d</sup>The University of Texas Graduate School of Biomedical Sciences, Houston, TX 77030

<sup>e</sup>Department of Immunology, MD Anderson Cancer Center, Houston, TX 77030

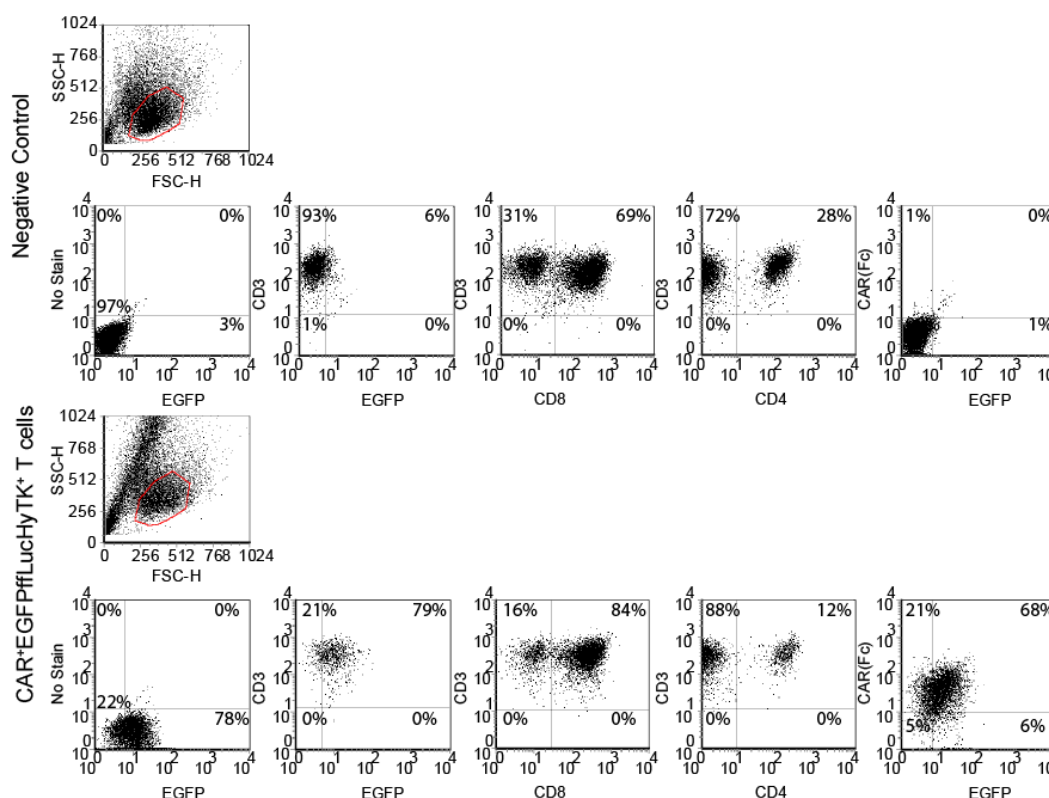

**Fig. S1.** Flow cytometry analyses of CD19-specific CAR<sup>+</sup>EGFP<sup>fl</sup>LucHyTK<sup>+</sup> T cells before cryopreservation 35 days after electro-transfer of SB plasmids. 10<sup>6</sup> T cells in 100 μL volume were stained with fluorochrome-conjugated to antibody [phycoerythrin (PE), peridinin chlorophyll protein conjugated to cyanine dye (PerCPCy5.5), allophycocyanin (APC)]: anti-CD3 PE (Cat. # 347347, 2.5 μL, BD Biosciences), anti-CD4 APC (Cat. # 555349, 2.5 μL, BD Biosciences), anti-CD8 PerCPCy5.5 (Cat. # 341051, 4 μL, BD Biosciences), and PE-conjugated F(ab')<sub>2</sub> fragment of goat anti-human Fcγ (Cat. # H10104, 2.5 μL, Invitrogen) used to detect cell surface expression of the CAR. EGFP expression was analyzed and used as marker for estimating flLuc expression. Blocking of nonspecific antibody binding was achieved using wash buffer (2% FBS and 0.1% Sodium azide in PBS). Data acquisition was on a FACSCalibur (BD Biosciences) using CellQuest version 3.3 (BD Biosciences).

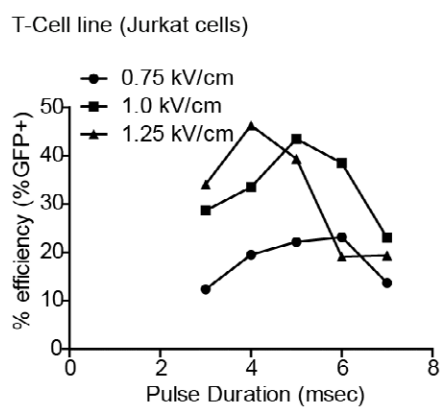

**Fig. S2.** Repeat of Figure 2A: Effect of electric field intensity and pulse duration on efficiency of electro-transfer of DNA plasmid (pmaxGFP) into T-cell lines (Jurkat cells).
